# Supplementary material for: Energy transfer and unusual decay behaviour of BaCa2Si3O9:Eu2+,Mn2+ phosphor
Source: Royal Society of Chemistry journal article supplement (doi:10.1039/c5dt00591d), 2015-01-01
Supplement: c5dt00591d1.pdf [file c5dt00591d1.pdf]

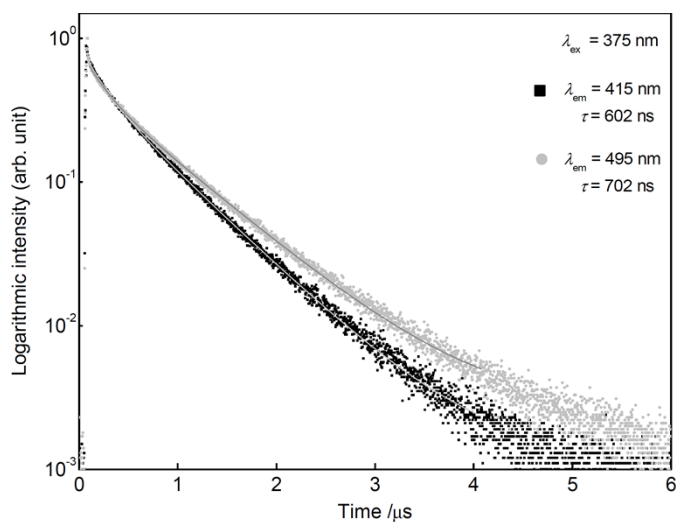

Fig. S1 PLD curves of  $\text{Ba}_{0.99}\text{Eu}_{0.01}\text{Ca}_2\text{Si}_3\text{O}_9$  monitored at 415 and 495 nm.

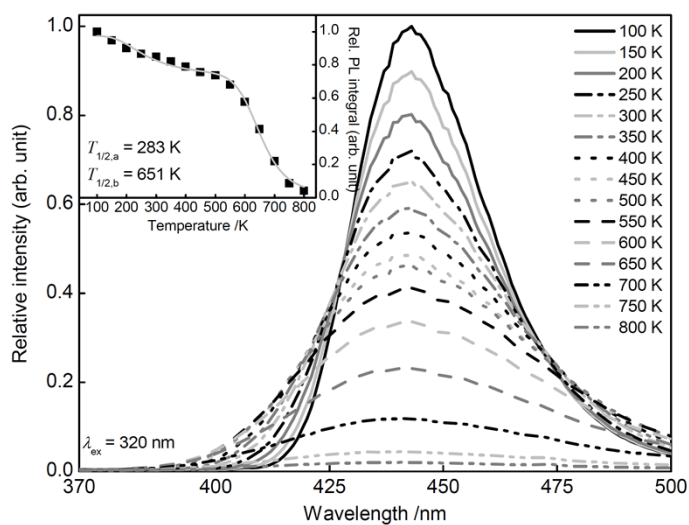

Fig. S2 PL spectra of  $\text{Eu}^{2+}$  of  $\text{Ba}_{0.99}\text{Eu}_{0.01}(\text{Ca}_{0.90}\text{Mn}_{0.10})_2\text{Si}_3\text{O}_9$  from 100 to 800 K and PL integral in dependence of temperature.

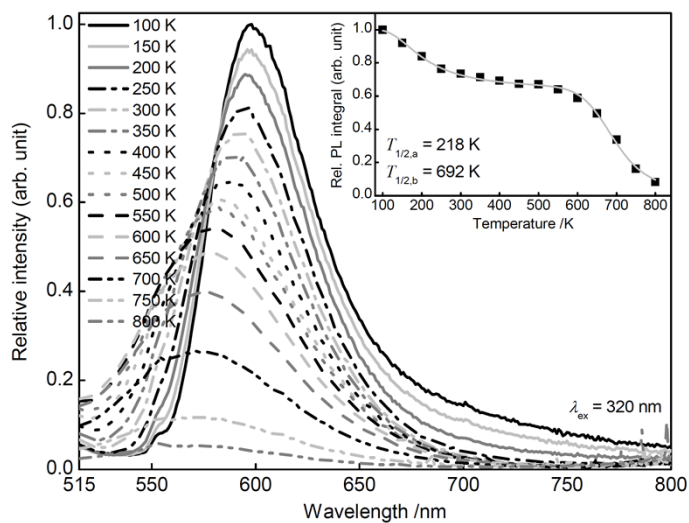

Fig. S3 PL spectra of  $\text{Mn}^{2+}$  of  $\text{Ba}_{0.99}\text{Eu}_{0.01}(\text{Ca}_{0.90}\text{Mn}_{0.10})_2\text{Si}_3\text{O}_9$  from 100 to 800 K and PL integral in dependence of temperature.

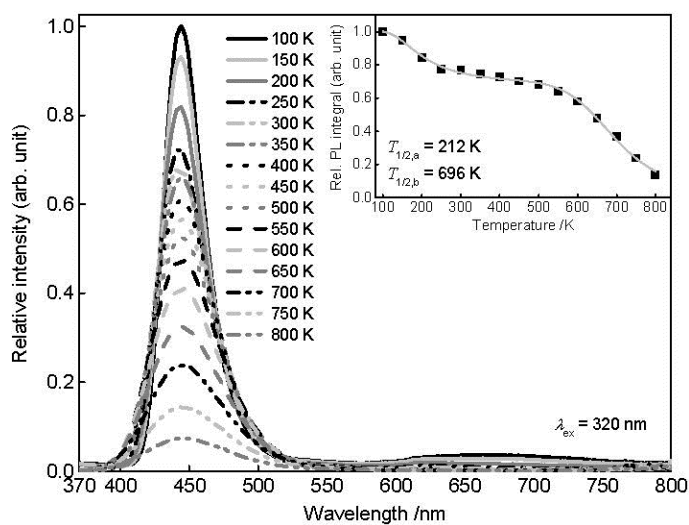

Fig. S4 PL spectra of  $\text{Ba}_{0.99}\text{Eu}_{0.01}\text{Ca}_2\text{Si}_3\text{O}_9$  from 100 to 800 K and PL integral in dependence of temperature.

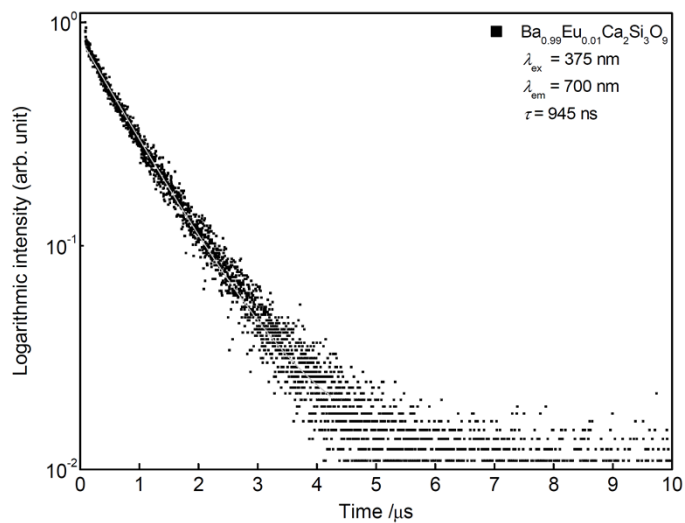

Fig. S5 PLD curve of  $\text{Ba}_{0.99}\text{Eu}_{0.01}\text{Ca}_2\text{Si}_3\text{O}_9$  monitored at  $\lambda_{\text{em}} = 700 \text{ nm}$  and  $T = 77 \text{ K}$ .

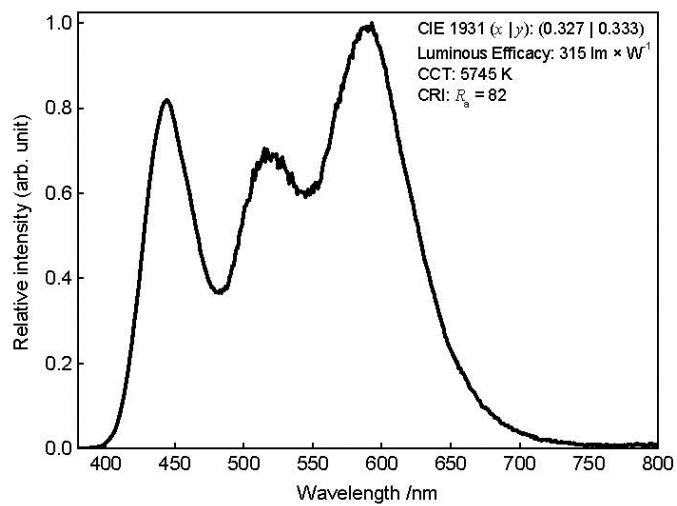

Fig S6 Simulated white emission spectrum consisting of  $\text{Ba}_{0.99}\text{Eu}_{0.01}\text{Ca}_{(0.80}\text{Mn}_{0.20})_2\text{Si}_3\text{O}_9$  and  $(\text{Ba}_{0.49}\text{Sr}_{0.49}\text{Eu}_{0.02})_2\text{SiO}_4$ .
